# Supplementary material for: Contribution of the Tyr-1 in Plantaricin149a to Disrupt Phospholipid Model Membranes
Source: Int J Mol Sci. 2013 Jun 7;14(6):12313–28. doi: 10.3390/ijms140612313 (PMC3709787; doi:10.3390/ijms140612313)

## Supplementary Information

**Figure S1.** Reverse Phase Chromatography of the four analog peptides (a) Pln149a; (b) Pln149S; (c) Pln149W; (d) Pln149SW. Column was equilibrated with H<sub>2</sub>O (TFA 0.1%) and eluted in a gradient of acetonitrile 90% (TFA 0.1%) in 40 min (dotted curves), flow rate of 1 mL/min.

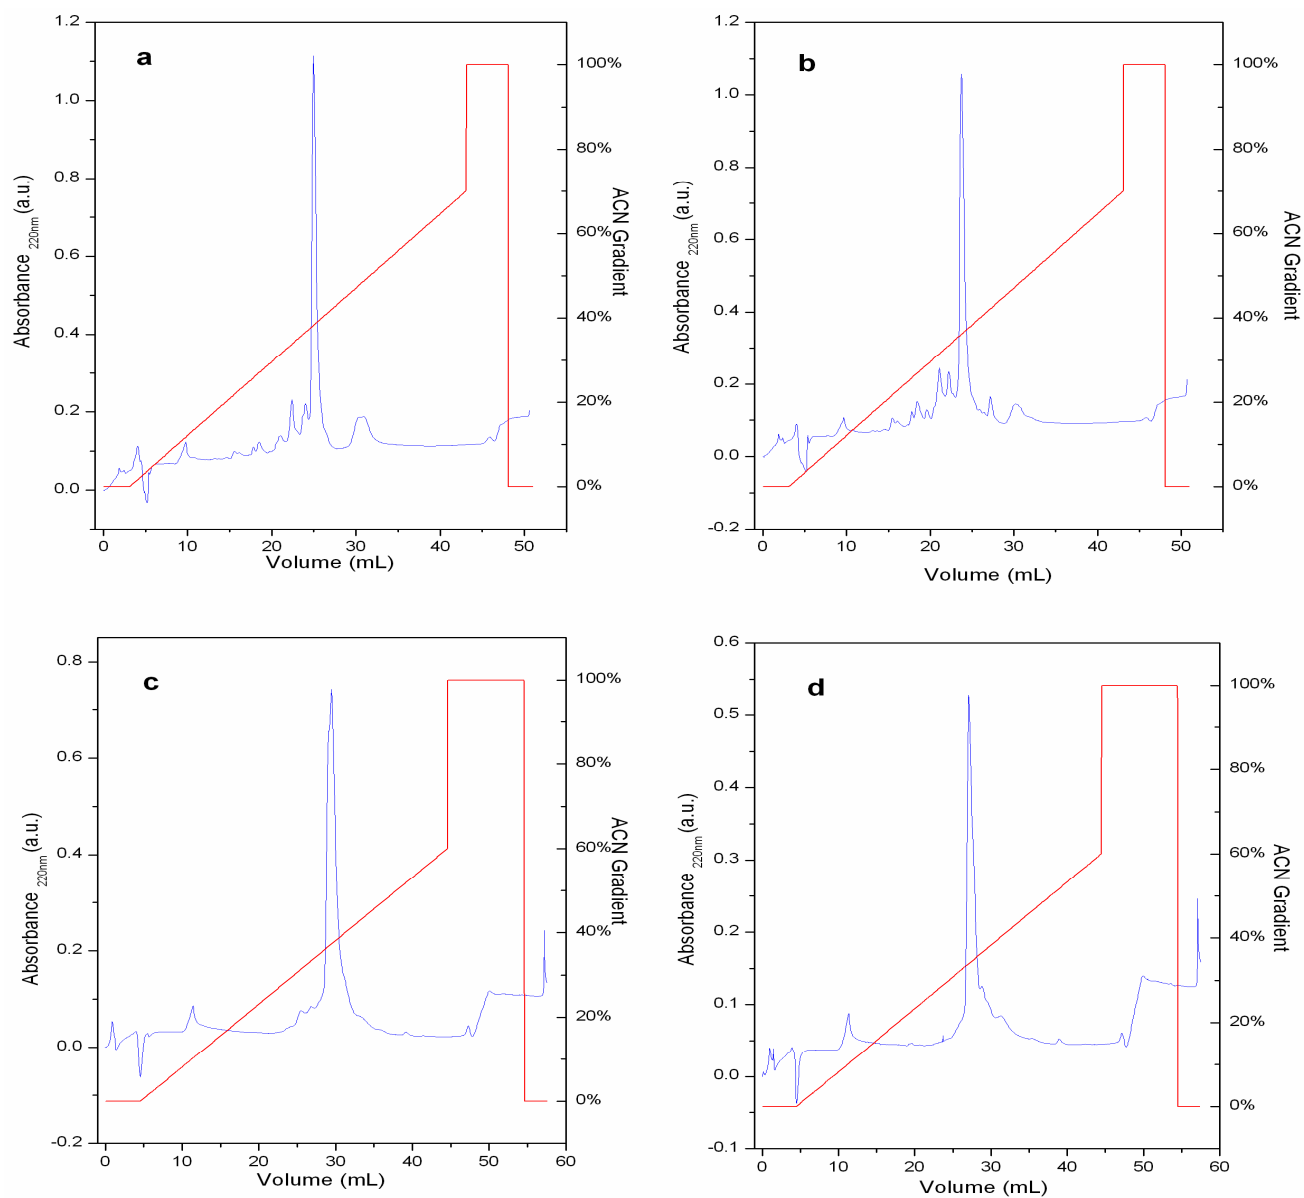

**Figure S2.** Leakage assays of Pln149a and Pln149S. (a) The internal content of DPPG was released by the action of Pln149S (1 to 16  $\mu\text{M}$ ). Leakage action of (b) Pln149a (0.5 to 2  $\mu\text{M}$ ) and (c) Pln149S (1 to 3  $\mu\text{M}$ ) on POPG liposomes.

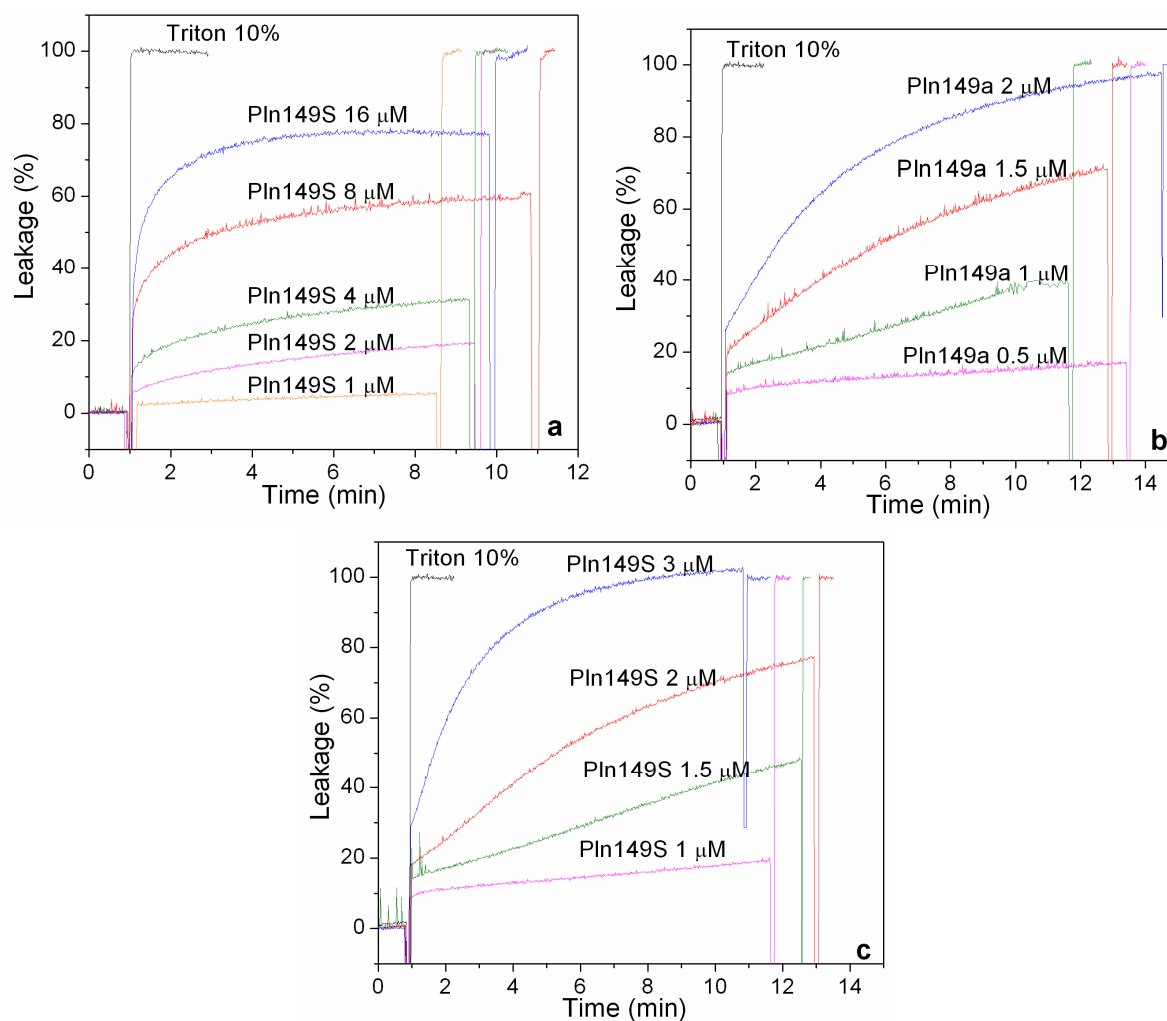

Supplement: Supplementary file 1 [file ijms-14-12313-s001.pdf]
